# Supplementary material for: A composite dressing combining ultralong hydroxyapatite nanowire bio-paper and a calcium alginate hydrogel accelerates wound healing
Source: Royal Society of Chemistry journal article supplement (doi:10.1039/d4tb01710b), 2024-11-26
Supplement: d4tb01710b1.pdf [file d4tb01710b1.pdf]

## Supplementary Information

### **A composite dressing combining ultralong hydroxyapatite nanowire bio-paper and calcium alginate hydrogel accelerates wound healing**

Yuankang Zhu <sup>1#</sup>, Liangshi Hao <sup>1#</sup>, Yurui Luo <sup>3</sup>, Jing Gao <sup>1</sup>, Fengming Xu <sup>1</sup>, Han Li <sup>1</sup>,  
Changning Hao <sup>1</sup>, Chao-Po Lin <sup>3</sup>, Han-Ping Yu <sup>2\*</sup>, Ying-Jie Zhu <sup>2\*</sup>, Junli Duan <sup>1\*</sup>

<sup>1</sup> Department of Gerontology, Xinhua Hospital affiliated to Shanghai Jiaotong University School of Medicine, Shanghai 200082, P. R. China

<sup>2</sup> State Key Laboratory of High Performance Ceramics and Superfine Microstructure, Shanghai Institute of Ceramics, Chinese Academy of Sciences, Shanghai 200050, P. R. China

<sup>3</sup> School of Life Science and Technology, Shanghai Tech University, Shanghai, 201210, P. R. China

\* Correspondence:

J. L. Duan: [duanjunli@xinhumed.com.cn](mailto:duanjunli@xinhumed.com.cn)

Y. J. Zhu: [y.j.zhu@mail.sic.ac.cn](mailto:y.j.zhu@mail.sic.ac.cn)

H. P. Yu: [yuhanping@mail.sic.ac.cn](mailto:yuhanping@mail.sic.ac.cn)

# These authors contributed equally to this work.

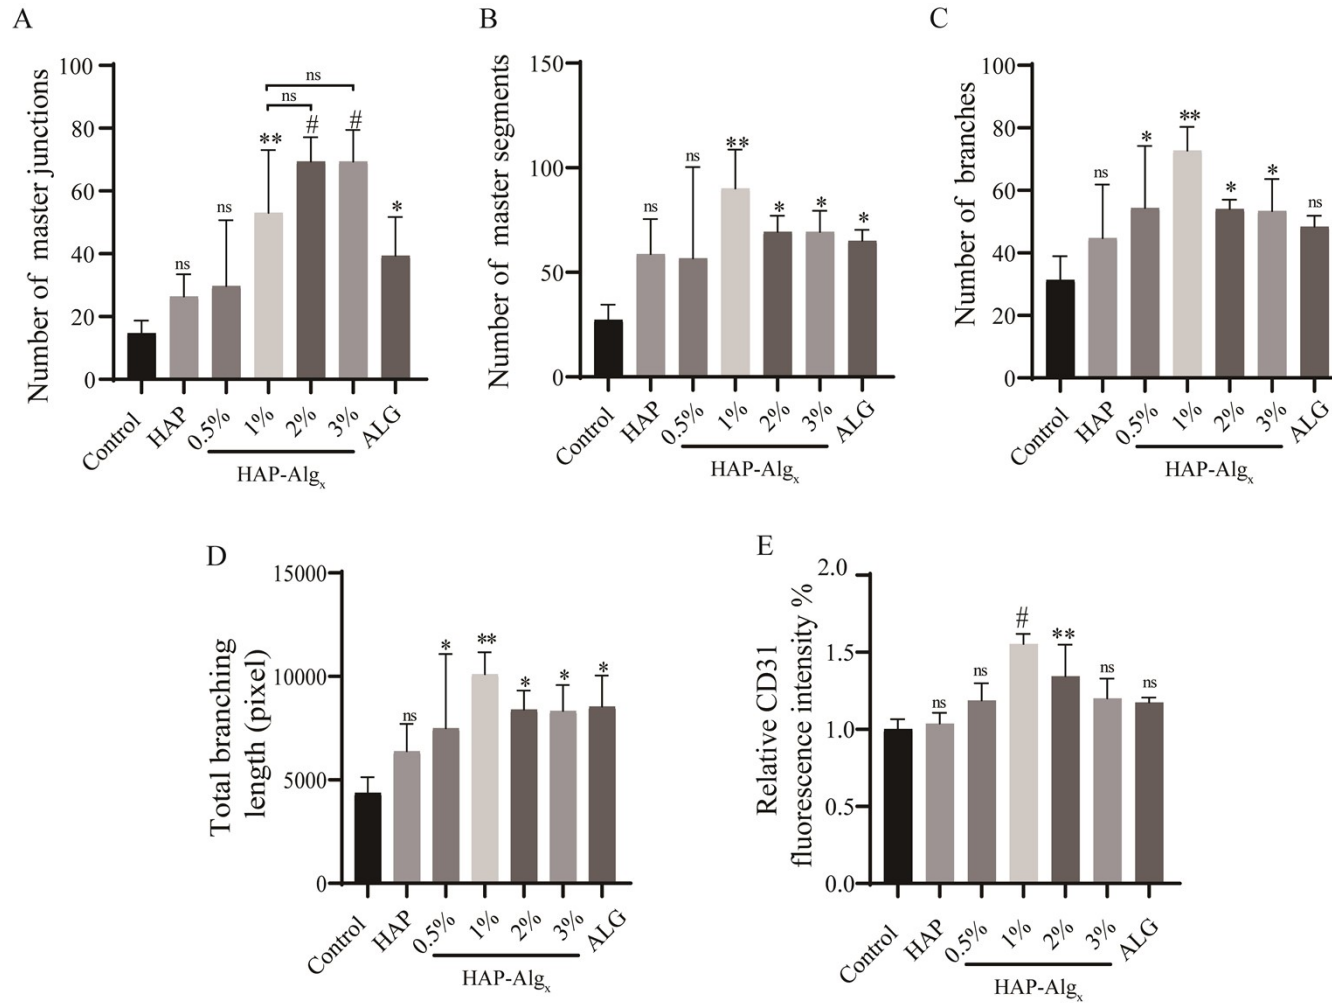

**Supplementary Figure S5. Human vascular organoids (BVOs) using different samples.** (A) Numbers of master junction of BVOs. (B) Numbers of master segments of BVOs. (C) Numbers of branches of BVOs. (D) Total branching length of BVOs. (E) Relative CD31 fluorescence intensity of BVOs to the control. Significant p-values are indicated: \* $p < 0.05$ , \*\* $p < 0.01$  and # $p < 0.001$  compared with the control group.
